# Supplementary material for: Hyperbaric Oxygen Treatment for Carbon Monoxide Poisoning in Italy: Retrospective Validation of a Data Collection Tool for the Italian Registry of Carbon Monoxide Poisonings (IRCOP)
Source: MDPI journal article supplement (doi:10.3390/ijerph17020574), 2020-01-16
Supplement: s1 [file s1]

| centro        | intox       | anno |
|---------------|-------------|------|
| Calabria      | 152         | 2015 |
| Calabria      | 146         | 2016 |
| Larino        | 6           | 2015 |
| Larino        | 0           | 2016 |
| <i>DB</i>     | <i>1383</i> |      |
| <b>TOTALE</b> | <b>1687</b> |      |
