# Supplementary material for: Hyperbaric Oxygen Treatment for Carbon Monoxide Poisoning in Italy: Retrospective Validation of a Data Collection Tool for the Italian Registry of Carbon Monoxide Poisonings (IRCOP)
Source: MDPI journal article supplement (doi:10.3390/ijerph17020574), 2020-01-16
Supplement: s1 [file s1]

## Supplementary Material 2

| Country of origin | n    | %       |
|-------------------|------|---------|
| Italy             | 709  | 51.27%  |
| Morocco           | 209  | 15.11%  |
| Senegal           | 53   | 3.83%   |
| Egypt             | 47   | 3.40%   |
| Albania           | 45   | 3.25%   |
| Romania           | 27   | 1.95%   |
| Tunisia           | 25   | 1.81%   |
| Pakistan          | 17   | 1.23%   |
| India             | 11   | 0.80%   |
| Nigeria           | 11   | 0.80%   |
| Côte d'Ivoire     | 9    | 0.65%   |
| Peru              | 9    | 0.65%   |
| Philippines       | 9    | 0.65%   |
| Cameroon          | 8    | 0.58%   |
| China             | 8    | 0.58%   |
| Ecuador           | 6    | 0.43%   |
| Guinea            | 5    | 0.36%   |
| Turkey            | 5    | 0.36%   |
| Burkina Faso      | 4    | 0.29%   |
| Ghana             | 4    | 0.29%   |
| Mauritius         | 4    | 0.29%   |
| Moldova           | 4    | 0.29%   |
| Bangladesh        | 3    | 0.22%   |
| Germany           | 3    | 0.22%   |
| Poland            | 3    | 0.22%   |
| Sri Lanka         | 3    | 0.22%   |
| Switzerland       | 3    | 0.22%   |
| Algeria           | 2    | 0.14%   |
| Santo Domingo     | 2    | 0.14%   |
| France            | 2    | 0.14%   |
| Syria             | 2    | 0.14%   |
| United Kingdom    | 2    | 0.14%   |
| Benin             | 1    | 0.07%   |
| Brazil            | 1    | 0.07%   |
| Cuba              | 1    | 0.07%   |
| Sierra Leone      | 1    | 0.07%   |
| Ukraine           | 1    | 0.07%   |
| Venezuela         | 1    | 0.07%   |
| Unknown           | 123  | 8.89%   |
| Total             | 1383 | 100.00% |

Most of the patients were from Italy, followed by subjects from Morocco.

| Number of HBOTs | n   | %      |
|-----------------|-----|--------|
| 1               | 662 | 47.88% |
| 2               | 305 | 22.05% |
| 3               | 6   | 0.43%  |
| 4               | 5   | 0.36%  |
| 5               | 4   | 0.29%  |
| 10              | 1   | 0.07%  |
| Missing data    | 400 | 28.92% |

Most of the patients received one hyperbaric oxygen treatment (HBOT). Unfortunately, in 400 patients, it was not possible to verify the number of treatments performed due to data lacking from charts or patients transferred to other facilities.
