# Supplementary material for: Hyperbaric Oxygen Treatment for Carbon Monoxide Poisoning in Italy: Retrospective Validation of a Data Collection Tool for the Italian Registry of Carbon Monoxide Poisonings (IRCOP)
Source: MDPI journal article supplement (doi:10.3390/ijerph17020574), 2020-01-16
Supplement: s1 [file s1]

## Supplementary Material 1: data collection tool.

|                                                                                      |     |     |                              |     |         |       |
|--------------------------------------------------------------------------------------|-----|-----|------------------------------|-----|---------|-------|
| Collaborating Center ID                                                              |     |     |                              |     |         |       |
| Name, location                                                                       |     |     |                              |     |         |       |
| Date, time                                                                           |     |     |                              |     |         |       |
| 1) Patient's characteristics                                                         |     |     |                              |     |         |       |
| Gender                                                                               |     |     |                              |     |         |       |
| Age (in years; months if < 1-year-old)                                               |     |     |                              |     |         |       |
| Nationality                                                                          |     |     |                              |     |         |       |
| Pregnancy (Y/N)                                                                      |     |     | If YES: Gestation week _____ |     |         |       |
| Anamnestic risk factors: cardiovascular; neurological; metabolic; other (specify)*   |     |     |                              |     |         |       |
| 2) CO intoxication modality                                                          |     |     |                              |     |         |       |
| Source of Intoxication (one among these items)                                       |     |     |                              |     |         |       |
| Solid fuel (charcoal; wood; pellets; other)                                          |     |     |                              |     |         |       |
| Liquid/gas fuel (gasoline; diesel; kerosene; methane; propane; other)                |     |     |                              |     |         |       |
| Fire                                                                                 |     |     |                              |     |         |       |
| Other                                                                                |     |     |                              |     |         |       |
| Exposure modality (one among these items)                                            |     |     |                              |     |         |       |
| Accidental (Home; Work-related exposure; other); Intentional                         |     |     |                              |     |         |       |
| Length of exposure: Minutes ____ OR Unknown                                          |     |     |                              |     |         |       |
| Single exposure OR Repeated exposure                                                 |     |     |                              |     |         |       |
| 3) Emergency Medical Service and Emergency Department                                |     |     |                              |     |         |       |
| ED Presentation Modality: Self-referral; EMS; referral by a healthcare provider*     |     |     |                              |     |         |       |
| Oxygen before HBOT*                                                                  |     |     |                              |     |         |       |
| Oxygen with mask: during EMS retrieval; at the ED; during ED to chamber transfer.*   |     |     |                              |     |         |       |
| Intubation (and where)*                                                              |     |     |                              |     |         |       |
| Level of consciousness at presentation (to EMS or at ED)                             |     |     |                              |     |         |       |
| One among: Alert; Depressed level of consciousness; intubated                        |     |     |                              |     |         |       |
| GCS (Total and split in Eye-Verbal-Motor)*                                           |     |     |                              |     |         |       |
| Symptoms at presentation (one or more) (to EMS or at ED)*                            |     |     |                              |     |         |       |
| Neurological (e.g., transitory ischemic attack, seizures)                            |     |     |                              |     |         |       |
| Cardiovascular (e.g., chest pain, peripheral ischemia)                               |     |     |                              |     |         |       |
| Other (specify)                                                                      |     |     |                              |     |         |       |
| Triage Registration Time                                                             |     |     |                              |     |         |       |
| First Arterial Blood Gas Analysis (complete)                                         |     |     |                              |     |         |       |
| Time*                                                                                | pH* | BE* | Lactic acid*                 | Hb* | Met-Hb* | CO-Hb |
| 4) Hyperbaric Facility                                                               |     |     |                              |     |         |       |
| Location of the referring site and distance (km)                                     |     |     |                              |     |         |       |
| Time of Transfer = [arrival at chamber time – departure from referring site time]    |     |     |                              |     |         |       |
| Time To Chamber (TTC) = [arrival at chamber time – first contact with the patient] * |     |     |                              |     |         |       |
| HBOT protocol                                                                        |     |     |                              |     |         |       |
| Arterial Blood Gas Analysis before the first HBOT (complete)                         |     |     |                              |     |         |       |

|                                                                                        |     |     |             |     |         |       |
|----------------------------------------------------------------------------------------|-----|-----|-------------|-----|---------|-------|
| Time*                                                                                  | pH* | BE* | Lactic acid | Hb* | Met-Hb* | CO-Hb |
| 5) Outcomes                                                                            |     |     |             |     |         |       |
| Arterial Blood Gas Analysis after the first HBOT (complete)                            |     |     |             |     |         |       |
| Time*                                                                                  | pH* | BE* | Lactic acid | Hb* | Met-Hb* | CO-Hb |
| Deceased during HBOT (Y/N)                                                             |     |     |             |     |         |       |
| Deceased after the first session of HBOT (Y/N)                                         |     |     |             |     |         |       |
| Conditions after the first session of HBOT *                                           |     |     |             |     |         |       |
| GCS (Total and split in Eye-Verbal-Motor)*                                             |     |     |             |     |         |       |
| Symptoms: asymptomatic; improved; unchanged.*                                          |     |     |             |     |         |       |
| Total number of HBOT performed_____                                                    |     |     |             |     |         |       |
| Troponin values (timing and type of troponin dosed)*                                   |     |     |             |     |         |       |
| Acute complications                                                                    |     |     |             |     |         |       |
| Cardiac; Vascular; Neurologic; Pulmonary; Other (specify).                             |     |     |             |     |         |       |
| Chronic complications: Delayed neurologic sequelae; myocardial injuries (Y/N/unknown)* |     |     |             |     |         |       |

ED: Emergency Department; EMS: Emergency Medical Service; HBOT: hyperbaric oxygen treatment; GCS: Glasgow Coma Scale; BE: base excess; Hb: hemoglobin; Met-Hb: methemoglobin; CO-Hb: carboxyhemoglobin; TTC: Time To Chamber.

\*These items were not present in the tool developed for the retrospective study but were implemented afterward, to provide further information and more comprehensive analysis in future prospective studies.
